# Supplementary material for: MiR-29b suppresses the proliferation and migration of osteosarcoma cells by targeting CDK6
Source: PubMed Central journal article supplement (PMC4887333; doi:10.1007/s13238-016-0277-2), 2016-05-26
Supplement: 13238_2016_277_MOESM1_ESM.pdf [file 13238_2016_277_MOESM1_ESM.pdf]

**Table S1. Summary of clinic characteristics of patients with osteosarcoma**

|                 | <b>Clinic characteristics</b> | <b>Number of cases</b> |
|-----------------|-------------------------------|------------------------|
| <b>Age</b>      | ≥15                           | 5                      |
|                 | <15                           | 1                      |
| <b>Gender</b>   | Male                          | 3                      |
|                 | Female                        | 3                      |
| <b>Location</b> | Femur                         | 2                      |
|                 | Tibia                         | 2                      |
|                 | Humeral bone                  | 1                      |
|                 | other                         | 1                      |
